# Supplementary material for: Breaking Emotional Barriers: How AI Mitigates Interpersonal Distance and Fosters Social Capability Growth
Source: Research Square preprint supplement (doi:10.21203/rs.3.rs-7495693/v1), 2025-12-10
Supplement: Supplementary file 1 [file 63c08c532f036727ddaaee62.docx]

**Appendix A**

**Scenario Priming Materials**

| Condition | English Version | Chinese Original |
| --- | --- | --- |
| Human–Human–Competence | Please recall a past interpersonal interaction related to this scenario and write it down in detail. “While working or studying, you encountered a difficulty that was hard to solve and particularly tricky. At that moment, you wanted to seek help from another person.” | 人际–能力组的情景启动语：请你认真回忆一段和此场景相关的人际交往记忆，并书写下来。“你在工作或学习时遇到了自己难以解决的困难，有一些特别棘手的问题，这时你想找人进行求助。” |
| Human–Human–Emotion | Please recall a past interpersonal interaction related to this scenario and write it down in detail. “In your personal life or career, you experienced an emotional situation that was difficult to resolve, involving some grievances and hardships. At that moment, you wanted to seek help from another person.” | 人际–情感组的情景启动语：请你认真回忆一段和此场景相关的人际交往记忆，并书写下来。“你在事业或生活中遇到自己难以排解的情绪，有一些委屈和难过，这时你想找人进行求助。” |
| Human–Machine–Competence | Please recall a past human–machine interaction related to this scenario and write it down in detail. “While working or studying, you encountered a difficulty that was hard to solve and particularly tricky. At that moment, you wanted to seek help from an AI system.” | 人机–能力组的情景启动语：请你认真回忆一段和此场景相关的人机交互记忆，并书写下来。“你在工作或学习时遇到了自己难以解决的困难，有一些特别棘手的问题，这时你想找人工智能进行求助。” |
| Human–Machine–Emotion | Please recall a past human–machine interaction related to this scenario and write it down in detail. “In your personal life or career, you experienced an emotional situation that was difficult to resolve, involving some grievances and hardships. At that moment, you wanted to seek help from an AI system.” | 人机–情感组的情景启动语：请你认真回忆一段和此场景相关的人机交互记忆，并书写下来。“你在事业或生活中遇到自己难以排解的情绪，有一些委屈和难过，这时你想找人工智能进行求助。” |
